# Supplementary material for: Outcomes in Critically Ill Patients Sedated with Intravenous Lormetazepam or Midazolam: A Retrospective Cohort Study
Source: MDPI journal article supplement (doi:10.3390/jcm10184091), 2021-09-10
Supplement: s1 [file s1]

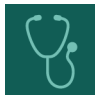

**Table S1.** Cox proportional hazards models.

|                                                                     | <b>Hazard Rate<br/>(95% CI) for ICU Length of Stay in Days</b> | <b><i>p</i></b> |
|---------------------------------------------------------------------|----------------------------------------------------------------|-----------------|
| Cox regression including APACHE II, age, gender and admission mode: |                                                                |                 |
| Use of midazolam                                                    | 1.75 (1.46–2.09)                                               | < 0.001         |
| Age                                                                 | 1.01 (1.01–1.02)                                               | < 0.001         |
| APACHE II                                                           | 1.03 (1.02–1.04)                                               | < 0.001         |
| Emergency surgery                                                   | 0.77 (0.61–0.98)                                               | 0.036           |
| Cox regression with additional inclusion of sedation index:         |                                                                |                 |
| Use of midazolam                                                    | 1.04 (0.83–1.31)                                               | 0.973           |
| SI48 $\geq 1,5$                                                     | 3.14 (2.23–4.43)                                               | < 0.001         |
| Age                                                                 | 1.01 (1.01–1.02)                                               | < 0.001         |
| APACHE II                                                           | 1.03 (1.02–1.04)                                               | < 0.001         |
| Emergency surgery                                                   | 0.72 (0.54–0.94)                                               | 0.017           |

Cox proportional hazards model of mortality during the intensive care unit stay. ICU: Intensive care unit; APACHE II: Acute physiology and chronic health evaluation II; SI48: Sedation index in the first 48 hours after initiation of treatment.
